# Supplementary material
Source: Springer Nature journal article supplement (https://www.springermedizin.de/resource/supplementary/12950_2011_291_MOESM6_ESM.pdf/9557478)

**SP-A**

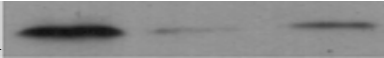

**33 kDa**

**1**

**2**

**3**

Supplement: MOESM6 [file 9557478]
